# Supplementary material for: Visual detection of Cronobacter sakazakii on a microfluidic chip fabricated by a 3D molding method
Source: Royal Society of Chemistry journal article supplement (doi:10.1039/d2an02002e), 2023-01-01
Supplement: d2an02002e1.pdf [file d2an02002e1.pdf]

“Supporting Information” of  
**Visual detection of *Cronobacter Sakazakii* on a microfluidic chip fabricated by  
3D molding method**

Xu Chen, \*<sup>a</sup> Yue Ma,<sup>a</sup> Shuangyu Miao,<sup>a</sup> Dongnan Li,<sup>a</sup> and Ye Zhang<sup>a</sup>

<sup>a</sup> Food Science College, Shenyang Agricultural University, Shenyang, China, 110866

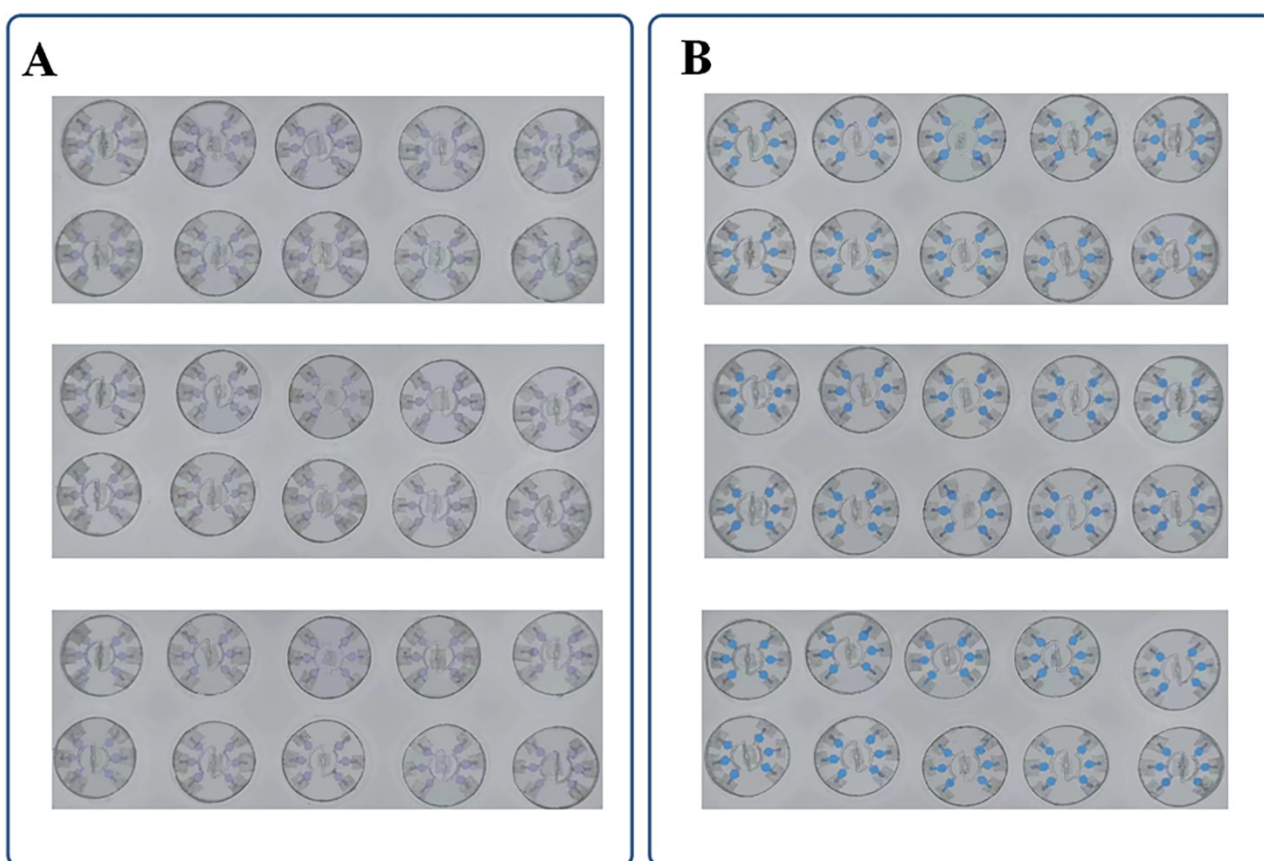

Fig. 1s A: thirty actual PIF samples collected from the local market were detected by the on-chip mCAMP; B: thirty actual PIF samples were artificially contaminated with *C. Sakazakii* ( $2.2 \times 10^3$  CFU/g) and detected by the on-chip mCAMP.
